# Supplementary material
Source: Springer Nature journal article supplement (http://publikationen.ub.uni-frankfurt.de/opus4/files/868/12860_2007_21_MOESM8_ESM.pdf)

**A**

TATA Box

BRE

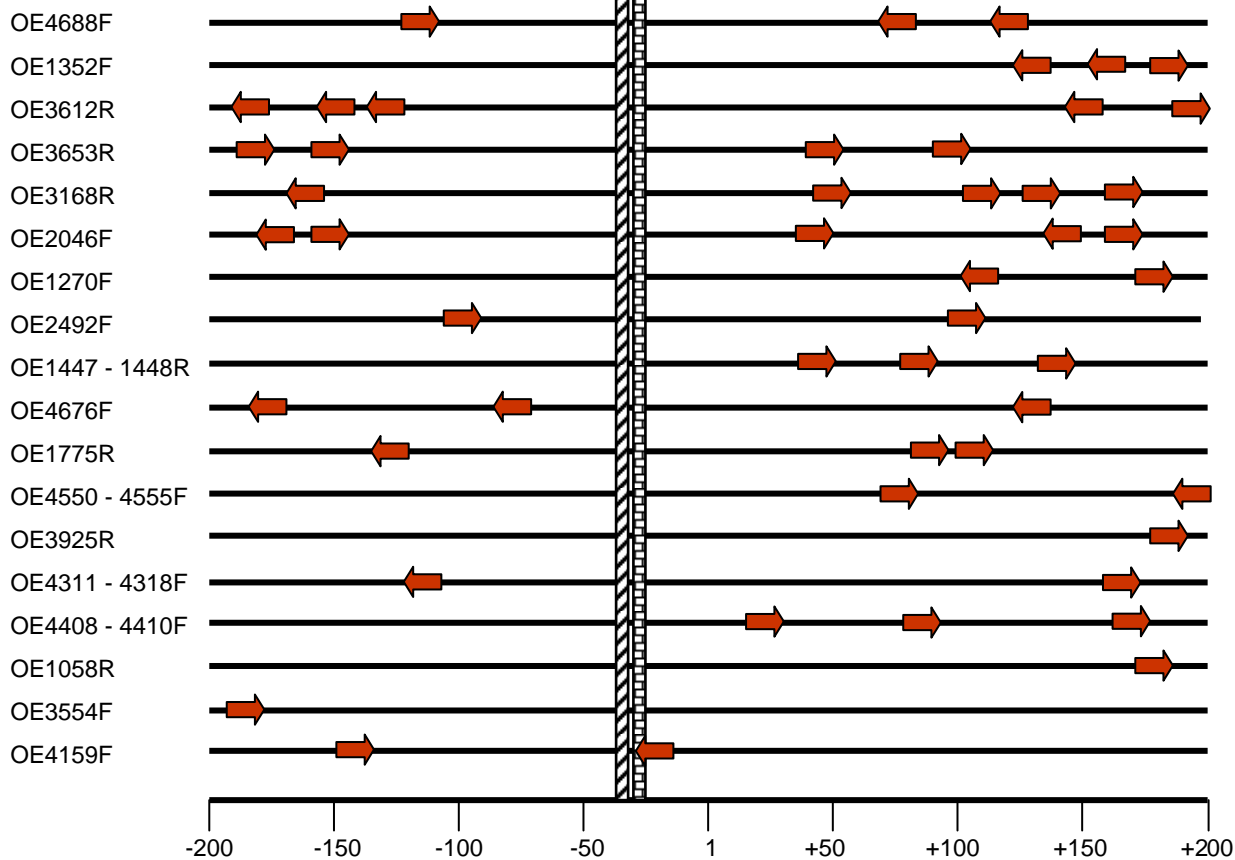**B**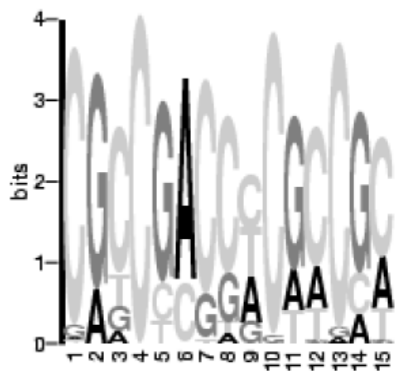

Supplement: MOESM8 [file 12860_2007_21_MOESM8_ESM.pdf]
